# Supplementary material
Source: HighWire-hosted journal article supplement (https://bmjopen.bmj.com/content/15/1/e090005)
Supplement: inline-supplementary-material-5 [file inline-supplementary-material-5.pdf]

Supplementary file 5: Study characteristics

| Author<br>Year<br>Country<br>Design                                                                                            | Study population<br>Number of participants                                                                                                                                                                                                  | Population characteristics                                                                     | Training target(s)<br>Outcomes collected<br>Tool(s) used                                                                                                                                                                                                         | Study findings                                                                                                                                                                                                                                                                                                                                                                       |
|--------------------------------------------------------------------------------------------------------------------------------|---------------------------------------------------------------------------------------------------------------------------------------------------------------------------------------------------------------------------------------------|------------------------------------------------------------------------------------------------|------------------------------------------------------------------------------------------------------------------------------------------------------------------------------------------------------------------------------------------------------------------|--------------------------------------------------------------------------------------------------------------------------------------------------------------------------------------------------------------------------------------------------------------------------------------------------------------------------------------------------------------------------------------|
| Altmiller<br>2023 [24]<br>USA<br><br>Pre-post<br>intervention<br>study with<br>comparison<br>group<br><br>Not randomised       | Undergraduate Junior (Year 3) and Senior (Year 4) nursing students undertaking baccalaureate programme at one nursing school in the mid-Atlantic USA<br><br>n=126<br>[I] n=63 (37 Juniors, 26 Seniors)<br>[C] n=63 (34 Juniors, 29 Seniors) | No further population characteristics provided<br><br>n=81 completed pre- and post-test survey | ATTITUDES<br>BELIEFS<br>COMFORT<br><br>Pre-post training surveys using Transgender Attitudes and Beliefs Scale (TABS)<br><br>Total score<br>Interpersonal comfort sub-scale<br>Sex and gender belief sub-scale<br>Human value sub-scale<br><br>Validated measure | Pre-post scores (between group comparison)<br><br>Total score:<br>[I] 0.84 score change; [C] 3.63 score change (p=0.829)<br><br>Interpersonal comfort:<br>[I] -0.66 score change; [C] 1.75 score change (p=0.608)<br><br>Sex/gender beliefs:<br>[I] 1.12 score change; [C] 1.75 score change (p=0.561)<br><br>Human value:<br>[I] 0.38 score change; [C] 0.12 score change (p=0.004) |
| Bauman and Hale [25]<br>1985<br>USA<br><br>Pre-post<br>intervention<br>study with<br>comparison<br>group<br><br>Not randomised | Undergraduate medical students (Year 1)<br><br>[I] Elective course on homosexuality<br>[C] Elective course on nutrition<br><br>Number of participants not stated                                                                            | No population characteristics provided                                                         | ATTITUDES<br><br>15-item pre-post course attitude questionnaire<br><br>7-point Likert scale<br><br>Non-validated measure                                                                                                                                         | Pre-post scores (between group comparison)<br><br>Pre-course:<br>[I] 84.9; [C] 74.7; p=0.04<br><br>Post-course:<br>[I] 91.1; [C] 74.7; p<0.001<br><br>Within group comparison:<br>[I] p=0.05; [C] No difference<br><br>[I] Significantly more accepting towards homosexual lifestyles on 12/15 measures; [C] No difference                                                           |
| Garcia Acosta<br>2019 [26]<br>Spain (Canary                                                                                    | Undergraduate nursing students (Years 3 and 4)                                                                                                                                                                                              | Sex:<br>[I] Arm 1: M: 7 (22.6%)<br>[I] Arm 2: M: 8 (28.6%)                                     | KNOWLEDGE<br>30-item Knowledge Questionnaire about                                                                                                                                                                                                               | Mean differences in post-test scores (between group comparison)                                                                                                                                                                                                                                                                                                                      |

| Author<br>Year<br>Country<br>Design                                                                                      | Study population<br>Number of participants                                                                                                                                                                                                                            | Population characteristics                                                                                                                                                                                                                  | Training target(s)<br>Outcomes collected<br>Tool(s) used                                                                                                                                                         | Study findings                                                                                                                                                                                                                                                                                                                                                                                                                                       |
|--------------------------------------------------------------------------------------------------------------------------|-----------------------------------------------------------------------------------------------------------------------------------------------------------------------------------------------------------------------------------------------------------------------|---------------------------------------------------------------------------------------------------------------------------------------------------------------------------------------------------------------------------------------------|------------------------------------------------------------------------------------------------------------------------------------------------------------------------------------------------------------------|------------------------------------------------------------------------------------------------------------------------------------------------------------------------------------------------------------------------------------------------------------------------------------------------------------------------------------------------------------------------------------------------------------------------------------------------------|
| Islands)<br><br>Pre-post<br>intervention<br>study with<br>comparison<br>group<br><br>Intervention<br>group<br>randomised | n=114<br>[I] Arm 1: (Film forum) n=31<br>Year 4 students<br><br>[I] Arm 2: (Problem-based<br>learning) n=28 Year 4<br>students<br><br>[C] n=57 Year 3 students<br>from same faculty                                                                                   | [C] M: 15 (26.3%)<br><br>Mean age:<br>[I] Arm 1: 23.0 (SD 4.1)<br>[I] Arm 2: 22.7 (SD 3.6)<br>[C] 22.1 (SD 4.9)<br><br>Sexuality:<br>[I] Arm 1: Heterosexual 24<br>(77.4%)<br>[I] Arm 2: Heterosexual 21 (75%)<br>[C] Heterosexual 53 (93%) | Transgender (KQaT)<br><br>Domains:<br>Biological (care protocol<br>for transgender<br>individuals)<br>Psychological<br>Social<br>Legal<br><br>Non-validated measure                                              | Film forum vs. control: mean difference 0.347<br>(95% CI: 0.271 to 0.424); p<0.05<br>PBL vs. control: mean difference 0.312 (95%<br>CI: 0.232 to 0.392); p<0.05<br><br>Significant improvement in knowledge post-<br>intervention between either intervention group<br>and control<br><br>Film forum vs. PBL: mean difference 0.036 (-<br>0.054 to 0.125); p=1.00<br><br>No difference in knowledge post-intervention<br>between intervention groups |
| Hawton<br>1979 [27]<br>UK<br><br>Pre-post<br>intervention<br>study with<br>comparison<br>group<br><br>Not randomised     | Undergraduate medical<br>students (Year 1)<br><br>n=70<br>[I] n=42 students taking<br>human sexuality course<br>[C] n=28 students at a similar<br>stage of clinical study to<br>whom the human sexuality<br>course was not available<br><br>[I] n=32 completed course | Substantially more male than<br>female students<br><br>No further population<br>characteristics provided                                                                                                                                    | ATTITUDES<br><br>22-item pre-post<br>questionnaire covering<br>various aspects of<br>sexuality<br><br>Pre-post questionnaire to<br>measure attitudes to<br>students' own sexuality<br><br>Non-validated measures | Pre-post scores (within group comparison)<br><br>[I] Significant change over time in attitudes<br>towards homosexuality (p<0.001)<br><br>[C] No differences over time in attitudes<br><br>The 10 students who dropped out had pre-<br>course scores suggesting less accepting<br>attitudes towards homosexuality (p<0.05)<br>compared with those who completed                                                                                       |
| Leslie<br>2018 [28]<br>USA<br><br>Randomised<br>controlled trial                                                         | Undergraduate medical<br>students (Year 1)<br><br>n=143<br>[I] n=72; [C] n=70                                                                                                                                                                                         | Sex:<br>[I] M: 41 (56.2%); F: 32 (43.8%)<br>[C] M: 41 (57.7%); F: 29 (40.8%)<br><br>Sexuality:<br>[I] Heterosexual: 69 (94.5%)<br>[C] Heterosexual: 64 (91.4%)<br><br>Ethnicity (white):                                                    | ATTITUDES<br><br>Implicit Association Test<br>(IAT) to assess implicit<br>bias<br><br>Validated measure                                                                                                          | Pre-post scores (between group comparison)<br><br>Implicit bias specific to sexuality:<br>[I] Post-intervention IAT mean 0.21<br>[C] Post-intervention IAT mean 0.42<br><br>Difference between groups 0.21; Cohen's<br>d=0.52 (moderate effect size) favouring<br>intervention; p=0.002                                                                                                                                                              |

| Author<br>Year<br>Country<br>Design                              | Study population<br>Number of participants                                                                                                                                                                                                                                                                                                                                                                                                                                                                                                                                  | Population characteristics                                                                                                     | Training target(s)<br>Outcomes collected<br>Tool(s) used                                                                                                                                                                                                                                                                                                                                                 | Study findings                                                                                                                                                                                                                                                                                                                                                                                                                                                                                                                                                                                                                                                                                                                                                                                                                                           |
|------------------------------------------------------------------|-----------------------------------------------------------------------------------------------------------------------------------------------------------------------------------------------------------------------------------------------------------------------------------------------------------------------------------------------------------------------------------------------------------------------------------------------------------------------------------------------------------------------------------------------------------------------------|--------------------------------------------------------------------------------------------------------------------------------|----------------------------------------------------------------------------------------------------------------------------------------------------------------------------------------------------------------------------------------------------------------------------------------------------------------------------------------------------------------------------------------------------------|----------------------------------------------------------------------------------------------------------------------------------------------------------------------------------------------------------------------------------------------------------------------------------------------------------------------------------------------------------------------------------------------------------------------------------------------------------------------------------------------------------------------------------------------------------------------------------------------------------------------------------------------------------------------------------------------------------------------------------------------------------------------------------------------------------------------------------------------------------|
|                                                                  |                                                                                                                                                                                                                                                                                                                                                                                                                                                                                                                                                                             | [I] White: 60 (83.3%)<br>[C] White: 48 (76.2%)                                                                                 |                                                                                                                                                                                                                                                                                                                                                                                                          |                                                                                                                                                                                                                                                                                                                                                                                                                                                                                                                                                                                                                                                                                                                                                                                                                                                          |
| Martin<br>2022 [29]<br>USA<br><br>Randomised<br>controlled trial | Undergraduate medical and<br>nursing students and<br>physician assistants<br><br>n=200 (immediate post-<br>intervention follow-up)<br><br>[I] Arm 1: TGD woman<br>presenting with embedded<br>videos of TGD adolescent<br>lived experience (n=46)<br><br>[I] Arm 2: Cisgender woman<br>presenting with embedded<br>videos of TGD adolescent<br>lived experience (n=46)<br><br>[I] Arm 3: Cisgender woman<br>presenting without embedded<br>videos (n=44)<br><br>[C] Arm 4: No intervention<br>(n=64)<br><br>n=100 completed 30-day<br>follow-up (n=19; n=28; n=29;<br>n=24) | Sex:<br>M: 39 (20%); F: 141 (71%); Non-<br>binary: 20 (10%)<br><br>Age:<br>18-25: 52 (26%)<br>26-35: 68 (34%)<br>36+: 80 (50%) | ATTITUDES<br>COMFORT<br><br>Change in total score of<br>Transgender Knowledge,<br>Attitudes and Beliefs<br>Scale (T-KAB) and<br>differences in sub-<br>domains:<br><br>Social tolerance<br>Comfort and contact<br>Acceptance<br><br>Validated measure<br>(adapted)<br><br>T-KAB adapted by<br>changing wording from<br>“transgender men or<br>women” to “adolescent<br>males” or “adolescent<br>females” | Pre-post scores (between group comparison)<br><br>Mean scores on all measures of T-KAB<br>increased in video group compared to the no<br>video group; Improvements persisted after 30<br>days (p<0.01)<br><br>Within group comparison:<br><br>Arm 1:<br>Total: t=4.80; p<0.001<br>Social tolerance: t=1.48 [NS]<br>Comfort and contact: t=2.62; p<0.05<br>Acceptance: t=3.86; p<0.001<br><br>Arm 2:<br>Total: t=2.77; p<0.01<br>Social tolerance: t=1.53 [NS]<br>Comfort and contact: t=2.65; p<0.05<br>Acceptance: t=3.16; p<0.01<br><br>Arm 3:<br>Total: t=3.91 p<0.001<br>Social tolerance: t=0.57 [NS]<br>Comfort and contact: t=0.87 [NS]<br>Acceptance: t=3.15; p<0.01<br><br>All intervention arms combined:<br>Total: t=3.77; p<0.001<br>Social tolerance: t=0.59; p<0.05<br>Comfort and contact: t=1.96; p<0.001<br>Acceptance: t=1.75, p<0.001 |

| Author<br>Year<br>Country<br>Design                                                                                       | Study population<br>Number of participants                                                                                                                                | Population characteristics                                                              | Training target(s)<br>Outcomes collected<br>Tool(s) used                                                                                                                                                | Study findings                                                                                                                                                                                                                                                                                                                                                                                                              |
|---------------------------------------------------------------------------------------------------------------------------|---------------------------------------------------------------------------------------------------------------------------------------------------------------------------|-----------------------------------------------------------------------------------------|---------------------------------------------------------------------------------------------------------------------------------------------------------------------------------------------------------|-----------------------------------------------------------------------------------------------------------------------------------------------------------------------------------------------------------------------------------------------------------------------------------------------------------------------------------------------------------------------------------------------------------------------------|
| Ozkara San<br>2020 [30]<br>USA<br><br>Pre-post<br>intervention<br>study with<br>comparison<br>group<br><br>Not randomised | Undergraduate nursing<br>students with prior degree<br><br>n=68<br>[I] n=16 taking foundations of<br>oncology elective course<br>[C] n=52 taking other<br>mandated course | Sex:<br>M: 16%; F: 84%<br><br>Age:<br>25-30: 54%<br><br>Ethnicity:<br>White: 51%        | SELF-EFFICACY<br><br>Scores on Transcultural<br>Self-Efficacy Tool (TSET)<br><br>Total score<br>Cognitive sub-scale<br>Practical sub-scale<br>Affective sub-scale<br><br>Validated measure              | Mean difference (SD) in pre-post scores<br>(between group comparison)<br><br>Total:<br>[I] 1.35 (0.71); [C] 0.85 (0.81); p=0.027<br><br>Cognitive:<br>[I] 1.57 (0.78); [C] 0.99 (1.0); p=0.025<br><br>Practical:<br>[I] 1.42 (1.08); [C] 1.19 (1.26); NS<br><br>Affective:<br>[I] 1.49 (0.98); [C] 0.41 (0.96); p=0.024                                                                                                     |
| Schabath<br>2022 [31]<br>USA<br><br>Randomised<br>pragmatic trial                                                         | Randomly selected<br>postgraduate oncologists<br>selected for equal distribution<br>across the USA<br><br>n=225                                                           | No further population<br>characteristics provided                                       | KNOWLEDGE<br>ATTITUDES<br>PRACTICE<br><br>LBGT-related knowledge,<br>attitudes and affirmative<br>practices immediately<br>after intervention and at 3-<br>month follow-up<br><br>Non-validated measure | Pre-post scores (within group comparison)<br><br>LGBT-related attitudes<br>[I] Significant improvement (p<0.001)<br>[C] No significant change (p=0.98)<br><br>LGBT-affirming practice<br>[I] Significant improvement (p<0.01)<br>[C] Significant improvement (p<0.01)<br><br>Knowledge<br>[I] Significant improvement (p<0.01)<br>[C] Significant improvement (p<0.01)<br><br>Similar significant findings seen at 3 months |
| Singer<br>2019 [32]<br>USA<br><br>Pre-post<br>intervention                                                                | Perinatal healthcare<br>professionals (obstetricians,<br>nurse-midwives, nurse<br>practitioners, registered<br>nurses, physician assistants)                              | Sex:<br>M: 30 (16%); F: 157 (84%)<br><br>Age:<br>20-29: 72 (38.5%)<br>20-39: 46 (24.6%) | KNOWLEDGE<br>ATTITUDES<br>INTENDED BEHAVIOUR<br><br>Providing perinatal care to<br>LGBT patients                                                                                                        | Pre-post scores (within group comparison)<br><br>Commitment to LGBT/queer care:<br>[I] No difference; [C] No difference<br><br>Prejudice:                                                                                                                                                                                                                                                                                   |

| Author<br>Year<br>Country<br>Design                                                                                  | Study population<br>Number of participants                                                                                                                | Population characteristics                                                                                                                                                                                                                                                                | Training target(s)<br>Outcomes collected<br>Tool(s) used                                                                                                                         | Study findings                                                                                                                                                                                                                                                                                                                                                                                                                                                                                                                                        |
|----------------------------------------------------------------------------------------------------------------------|-----------------------------------------------------------------------------------------------------------------------------------------------------------|-------------------------------------------------------------------------------------------------------------------------------------------------------------------------------------------------------------------------------------------------------------------------------------------|----------------------------------------------------------------------------------------------------------------------------------------------------------------------------------|-------------------------------------------------------------------------------------------------------------------------------------------------------------------------------------------------------------------------------------------------------------------------------------------------------------------------------------------------------------------------------------------------------------------------------------------------------------------------------------------------------------------------------------------------------|
| study with<br>comparison<br>group<br><br>Not randomised                                                              | n=187<br>[I] n=99; [C] n=88                                                                                                                               | 40-49: 27 (14.4%)<br>50-59: 26 (13.9%)<br>60-69: 10 (5.3%)<br><br>Sexuality:<br>Heterosexual: 135 (72.2%)<br>Ally: 9 (4.8%)<br>LGBTQ: 22 (11.8%)                                                                                                                                          | 5-point Likert scale<br><br>Scale items aggregated<br>into 7 sub-scales<br><br>Non-validated measure                                                                             | [I] NS reduction; [C] Sig. increase<br><br>Sensitive language:<br>[I] Sig. improvement; [C] Sig. improvement<br>larger for intervention<br><br>Misconception:<br>[I] Sig. improvement; [C] NS improvement<br><br>Normativity:<br>[I] Sig. improvement; [C] No difference<br><br>Health care equivalence:<br>[I] No difference; [C] No difference                                                                                                                                                                                                      |
| White<br>2020 [33]<br>USA<br><br>Pre-post<br>intervention<br>study with<br>comparison<br>group<br><br>Not randomised | Postgraduate nursing<br>students<br><br>n=94<br>[I] n=30 students enrolled on<br>course<br>[C] n=64 students enrolled at<br>institution but not on course | Sex:<br>[I] F: 29 (97%)<br>[C] F: 57 (89%)<br><br>Age:<br>[I]<br>18-29: 21 (71%)<br>30+: 9 (29%)<br>[C]<br>18-29: 47 (74%)<br>30+: 17 (26%)<br><br>Ethnicity:<br>[I] White: 29 (97%)<br>[C] White: 54 (84%)<br><br>Sexuality:<br>[I] Heterosexual: 28 (90%)<br>[C] Heterosexual: 57 (90%) | KNOWLEDGE<br>PREPAREDNESS<br>COMFORT<br>CONFIDENCE<br><br>Pre-post intervention<br>survey developed<br>according to Theory of<br>Planned Behaviour:<br><br>Non-validated measure | Mean differences (SD) in post-test scores<br>(between group comparison)<br><br>Sexual health knowledge:<br>[I] 94%; [C] 93%<br>No difference between groups<br><br>Preparedness to provide healthcare to diverse<br>populations:<br>[I] 4.37 (0.49); [C] 2.73 (1.14); Mean diff 1.63;<br>p<0.05<br><br>Comfort initiating discussions:<br>[I] 4.40 (0.89); [C] 3.50 (1.05); Mean diff 0.93;<br>p<0.05<br><br>Confidence performing sexual health<br>assessment with gender minorities:<br>[I] 3.80 (1.06); [C] 2.31 (0.81); Mean diff 1.49;<br>p<0.05 |

Key: C = control; I = intervention; TGD = Transgender; SD = standard deviation; LGBT = Lesbian, gay, bisexual, transgender; NS = Not significant
